# Supplementary material
Source: PubMed Central journal article supplement (PMC8329790)
Supplement: jamaneurol-e212385-s001.pdf [file jamaneurol-e212385-s001.pdf]

1

2 **Evaluation of direct transfer to angiography suite vs. computed**  
3 **tomography suite in endovascular treatment. Randomized**  
4 **clinical trial**

5

6

**Study code: ANGIOCAT**

7

8 **Abstract**

9 **Rationale:** Transferring patients directly to the angio-suite (DTAS) after admission  
10 leads to significant reduction of in-hospital times and has shown safety and efficacy in  
11 selected patients in three retrospective studies.

12 **Aim:** To explore the safety and benefit of DTAS in patients with suspected large vessel  
13 occlusion (Rapid Arterial occlusion Evaluation (RACE) scale >4) within 6 hours from  
14 symptoms onset by reducing workflow times as compared to a traditional CT admission  
15 protocol.

16 **Design:** Randomized, prospective, open clinical trial with a primary outcome evaluated  
17 by a blind investigator.

18 **Procedure:** Eligible patients must be 18 of age or older. A large vessel occlusion must  
19 be suspected based on a prehospital rapid arterial occlusion evaluation >4 within 6  
20 hours from stroke onset. The admitting CSC must be pre-notified by emergency  
21 medical services and the angio-suite and the treating team must be available. Patients  
22 will be randomly allocated to DTAS versus traditional neuroimaging following a 1:1  
23 ratio.

24 **Study outcome:** The primary endpoint is the modified Rankin Scale score at 90 days.  
25 The primary safety outcome is mortality at 90 days.

26 **Trial registry name:** Evaluation of Direct Transfer to Angiography Suite vs. Computed  
27 Tomography Suite in Endovascular Treatment: Randomized Clinical Trial  
28 (ANGIOCAT).

29 **Trial URL:** <https://clinicaltrials.gov/ct2/show/NCT04001738>

30 **Trial registration number:** NCT04001738

31 **Background**

32 The safety and efficacy of endovascular treatment (EVT) in acute stroke have been  
33 demonstrated in several trials(1). The relevance of time from onset to reperfusion was  
34 confirmed in these trials: for each 9 minutes delay in achieving reperfusion, one in  
35 every one hundred of patients undergoing EVT will present a worse outcome measured  
36 by modified Rankin scale (mRS)(2). Other studies determined that for each 30 minutes  
37 delay, the chances of achieving a 3-months favorable outcome decreased 10-15%(3).  
38 For this reason, strategies to improve prehospital and in-hospital workflows are being  
39 developed.

40 On one hand, strategies focused on identifying patients with a high suspicion of LVO  
41 and determine to which hospital the patients should be transferred. Many studies have  
42 demonstrated the usefulness of prehospital scales with the aim of reducing delays(4).  
43 The RACE scale is a tool designed for paramedics and emergency medical services  
44 (EMS); it is a simplified NIHSS scale version that scores neurological deficits from 0 to  
45 9(5). A score higher than 4 predicts the presence of large vessel occlusion (LVO) with  
46 a high sensitivity (85%) and specificity (68%). In Catalunya the RACE scale has been  
47 progressively implemented since 2014, and is currently reported in more than 95% of  
48 acute stroke codes before arrival to the admitting center.

49 Regarding, in-hospital workflow one of the most used indicators is time from arrival to  
50 groin-puncture. During this interval the stroke team has to evaluate the patient, confirm  
51 EVT indication and coordinate logistics that allows initiation of EVT. Usually the  
52 indication of treatment is supported by imaging (CT or MRI) which rules-out  
53 intracerebral hemorrhage or a large infarct core (ASPECTS<5) and confirms LVO.  
54 Neuroimage can be complemented by multiparametric CT or MRI even though  
55 guidelines recommend not basing the decisions on it within 6 hours form onset(6).  
56 Thanks to the team efforts several stroke centers have progressively reduced door to  
57 groin puncture times.

58 A recently published study among all acute stroke codes admitted to a CSC within 6  
59 hours from the onset showed that in over 90% of patients did not have a large infarct  
60 core which contraindicated EVT (ASPECTS<6)(7). These data along with the  
61 conclusion from HERMES meta-analysis which suggests that EVT in ASPECTS<6  
62 does not increase the complication rate and could be beneficial(1) led to consider the  
63 possibility of simplifying the selection protocol to reduce workflow times.

64 Following the coronary angioplasty protocols in acute myocardial infarction, some  
65 groups have investigated the safety and efficacy of DTAS circuits confirming the  
66 reduction of door to groin time up to 17 minutes without any safety concerns(8-10).

## ANGIOCAT protocol

67

68 We recently published a case-control study (DTAS vs conventional neuroimaging) in  
69 which subjects were matched by time from onset to hospital arrival, age, NIHSS and  
70 occlusion location. The study concluded that 80% of patients who met the inclusion  
71 criteria presented a LVO and DTAS transfer to reduced time from arrival to groin-  
72 puncture to 16 minutes as compared to 70 minutes in the control patients. This study  
73 showed that DTAS increased the odds of achieving a favorable outcome at 3 months.

74 The aim of Evaluation of Direct Transfer to Angiography Suite vs. Computed  
75 Tomography Suite in Endovascular Treatment: Randomized Clinical Trial (ANGIOCAT)  
76 is to explore the long term outcome following a DTAS protocol compared with  
77 conventional neuroimaging protocol.

78

79 **Study design**

80 ANGIOCAT is a randomized, prospective, open-label clinical trial with blinded  
81 assessment of the primary endpoint by an independent investigator.

82 Patients with suspected acute LVO identified by EMS are included. After  
83 confirmation of inclusion and exclusion criteria by the stroke neurologist at patient  
84 arrival, patients are randomized to one of two study arms:

- 85 1. Direct transfer to Angiography Suite (DTAS) where the EVT team is waiting for  
86 the patient. A FP-CT is performed to discard intracranial hemorrhage (ICH) or  
87 large established ischemic lesions which would contraindicate endovascular  
88 treatment. Afterwards a diagnostic angiogram is performed to confirm the  
89 presence of a LVO. If indicated, intravenous-tissue Plasminogen Activator (iv-  
90 tPA) can be initiated immediately after cone beam CT.
- 91 2. Direct transfer to CT (DTCT) suite where the usual neuroimaging protocol is  
92 performed including NCCT, CT angiography and CT perfusion. Within 6 hours  
93 from symptom onset CT perfusion could be requested by the treating physician.  
94 Once the imaging results are analyzed the treating team will indicate the  
95 reperfusion treatments according to current guidelines.

96 Independently of the allocated protocol, all patients receive equal care during  
97 admission in the stroke unit or ICU. Thrombectomy might be performed with any EMA  
98 approved thrombectomy device, at the discretion of the interventionalist. For patients  
99 with stenosis or occlusion of the cervical internal carotid artery due to atherosclerosis,  
100 carotid angioplasty with or without stenting is permitted as part of the acute  
101 intervention.

102 The study protocol was approved by the medical ethics committee (PR(AG)156/2018).  
103 All patients or their surrogates provided written informed consent.

104 **Patient population**

105 ANGIOCAT trial is a unicentric study however there was the possibility to  
106 incorporate new stroke centers with previous experience in DTAS protocols. Our center  
107 is a Comprehensive Stroke Center (CSC) with a high volume of cases (~300 EVT per  
108 year) and more than 2 years of experience with DTAS protocol (>150 DTAS cases)  
109 when the study started. Among DTAS patients, two thirds are secondarily transferred  
110 from a primary stroke center.

111 Patients that met all eligibility criteria were considered for enrolment if  
112 angiography suite and EVT team were available. We included stroke codes with  
113 suspected LVO (defined as prenotified Rapid Arterial Occlusion Evaluation (RACE)  
114 score >4 from EMS or from a primary stroke center (PSC), and confirmed National  
115 Institutes of Health Stroke Scale (NIHSS) score >10 at arrival by stroke neurologist)  
116 within 6 hours of symptom onset and a premorbid functional score of 2 or less on the  
117 modified Rankin scale (mRS).

## 118 **Patient eligibility criteria**

### 119 *Inclusion Criteria:*

- 120 1. Acute code stroke with clinically suspected Large vessel occlusion (RACE>4)  
121 within 6 hours from stroke onset either:
  - 122 a. Activated by EMS with prenotification
  - 123 b. Transferred from a primary stroke center.
- 124 2. Confirmation of NIHSS>10 at arrival by vascular neurologist.
- 125 3. Age ≥18 years.
- 126 4. Premorbid functional independence (mRS≤2)
- 127 5. Immediate availability of angiography suite.
- 128 6. Immediate availability of Endovascular treatment team (Neurologist,  
129 Interventionist, anesthesiologist, Nursery, Technicians...).
- 130 7. Deferred informed consent obtained from patient or acceptable patient  
131 surrogate (after the acute phase) was approved by the ethics committee.

### 132 *Exclusion Criteria:*

- 133 1. Hemodynamically unstable patients with requirement of advanced vital support.
- 134 2. Patients with limited life expectancy (<6 months) due to terminal disease.
- 135 3. Participation in any other clinical trial with a drug or device which could  
136 influence the outcome.
- 137 4. Patients with neurological or psychiatric disease that could undermine future  
138 evaluations.
- 139 5. Lack of disponibility for 90 days tracing.

## 140 **Randomization**

141 *Pre-alert to the stroke neurologist before randomization.* To ensure a high  
142 sensitivity and specificity to identify directly admitted to CSC patients, EMS contacted  
143 the stroke neurologist on call by telephone upon identification of an acute stroke patient  
144 with a RACE score >4 and time from symptom onset <6 hours. Transferred patients

## ANGIOCAT protocol

145 from a Primary Stroke Center were previously evaluated by a local neurologist or  
146 Telestroke and study criteria were checked. After arrival at CSC, stroke neurologist  
147 confirmed that the inclusion criteria were met and patients were enrolled the patient in  
148 the ANGIOCAT study.

149 *Randomization and minimization.* Patients were randomly allocated to DTAS or  
150 DTCT in a 1:1 ratio, following a randomization sequence provided by an independent  
151 investigator. To avoid an imbalance in the primary/secondary admission rate between  
152 the study groups a blocked randomization according to transfer provenance was  
153 performed: primary (no previous neuroimaging) versus transfer from other center  
154 (previous neuroimaging).

### 155 **Intervention**

156 Patients included in the study are assigned to one of two different protocols:

- 157 - DTCT: After a fast neurological evaluation, patient will be transferred to CT  
158 suite where the usual neuroimage protocol will be performed. After imaging  
159 evaluation patient will be transferred to angiography suite if is eligible to EVT  
160 (reference intervention)
- 161 - DTAS: After a fast neurological evaluation, patient will be direct transferred to  
162 angiography suite where EVT team will be waiting for it (experimental  
163 intervention).

### 164 **Clinical and radiological assessment**

165 All patients underwent clinical assessment including RACE on ambulance by EMS  
166 staff; NIHSS was assessed on admission, and during follow-up 24 hours, 5 days and at  
167 discharge, and mRS was evaluated at discharge by stroke neurologists. Relevant  
168 workflow times (symptoms onset, hospital admission, imaging acquisition, iv-tPA bolus,  
169 arterial puncture, reperfusion) were recorded by stroke neurologists. Functional  
170 outcome at 90 days was evaluated through a structured telephone-based interview  
171 performed by a central assessor blinded to group assignment. The missing data-  
172 handling method for the primary outcome endpoint (90 days mRS) will be: for patients  
173 in which vital status is known to be “alive”, last observation will be carried forward; for  
174 patients in which vital status is unknown imputation of worst value (mRS=6) will be  
175 provided.

176 Radiological variables as baseline Alberta Stroke Program Early Computed  
177 Tomography Score(11) (ASPECTS; range, 0 to 10, with 1 point subtracted for any  
178 evidence of early ischemic change in each defined region on the CT scan), baseline

179 presence and location of LVO (CTA or digital subtraction angiography), 24 hours  
180 follow-up CT or magnetic resonance imaging for the discard an intracranial  
181 hemorrhage were assessed by local neuroradiologists. Local interventional physicians  
182 assessed reperfusion status using the modified Thrombolysis in Cerebral Infarction  
183 (TICI) score, which ranges from 0 (no reperfusion) to 3 (complete reperfusion)(12).

184 **Outcomes**

185 *Primary outcome.*

186 The primary outcome is the mRS score at 90 days among ischemic stroke patients with  
187 confirmed LVO whether they received or not EVT (ITT population), as evaluated  
188 through a structured telephone-based interview performed by a central assessor  
189 who is blinded to group assignment. The primary analysis is the shift analysis of the  
190 mRS using an ordinal logistic regression to estimate the common OR.

191 *Secondary efficacy outcome.*

- 192 1. Time from door arrival to groin puncture (for patients receiving endovascular  
193 treatment).
- 194 2. Dramatic early favorable response as determined by an NIHSS <2 or  
195 NIHSS improvement  $\geq 10$  points at 24 hours in patients with LVO.
- 196 3. Rate of mRS  $\leq 2$  at 90 days among ischemic stroke patients with LVO.
- 197 4. Rate of patients receiving EVT
- 198 5. Analysis of the above objectives in different subgroups: primary vs secondary  
199 transferred patients,  $\leq 3$  vs  $>3$  hours from onset, NIHSS  $\leq 15$  vs  $>15$ , age  $\leq 80$  vs  
200  $>80$  years old.

201 *Safety outcomes*

202 Safety outcomes will be evaluated in the entire study population:

- 203 1. Rate of neurological deterioration ( $\geq 4$  NIHSS points increase) from baseline
- 204 2. Rate of patients with neurological complications, mainly symptomatic  
205 hemorrhagic transformation.
- 206 3. Procedural complications (new territory emboli, arterial perforation, arterial  
207 access complication, etc.).
- 208 4. Mortality at 90 days in all patients.

209



210 **Data protection**

211 Data collection (table 1) will follow a predefined protocol using an Excel datasheet  
212 template and moving afterwards to SPSS program for statistical analysis.. Data will be  
213 codified introduced following a numerical code to protect patient's personal data.

214 At the end of the study and once finished inclusion period, these data will be removed.  
215 This information will be guarded by the main investigator.

216 **Sample size estimates**

217 For sample size calculation preliminary results from our center and previous  
218 publications were used. We expect a 30 to 40 minutes reduction in door to groin  
219 puncture in the DTAS protocol. In patients with confirmed LVO undergoing EVT this  
220 could represent a 15% increase in the rate of mRS 0-2. The expected mRS 0-2  
221 distribution would be DTAS (55%) versus CT (40%).

222 With this prediction, in order to achieve a statistical power of 75% to detect differences  
223 by a bilateral Chi-square test with a significance level of 5% and a 1/1 distribution per  
224 study arm the necessary sample size is 306 patients. In the last 12 months, 240  
225 thrombectomies were performed in our center and over 100 patients have followed a  
226 DTAS protocol, thus we estimate an inclusion period of 3 years.

227 Patients will be followed for 90 days after treatment or up to death if it occurs first.

228 A first analysis will be performed after 150 patients are included and the study will finish  
229 if significant difference in functional outcome is demonstrated between both groups at  
230 90 days.

231 We plan to perform one interim analyses, when the primary endpoint of 50% (150  
232 patients with complete follow-up) is met. We assume a one-sided family wise error rate  
233 of 2.5%, a power of 75% and an OR of 1.70 (ln OR=0.5306) under the assumption of  
234 proportional odds. We will test against an OR of 1 (log OR=0) and we will use Pocock  
235 stopping boundaries for stopping the trial early due to superiority(13).. We will derive Z-  
236 values by dividing the estimated log OR from the ordinal logistic regression by its  
237 standard error. The Z-value follows a standard normal distribution and will be used to  
238 test the one-sided alternative hypothesis that the coefficient is higher than zero against  
239 the null hypothesis that the coefficient is lower than or equal to zero. The boundary for  
240 superiority of the active treatment over control at the interim analyses is Z statistics of  
241 2.178 and alpha error of 0.029.

242 **Statistical analyses**

## ANGIOCAT protocol

243 Primary outcome analysis will be performed in the modified intention-to-treat population  
244 (ischemic stroke codes with confirmed LVO). The primary analysis is a common odds  
245 ratio (OR) over the mRS at 90 days analyzed by ordinal logistic regression among  
246 ischemic stroke patients with LVO.

247 Secondary outcome analysis. Statistical significance for intergroup differences will be  
248 assessed by Pearson  $\chi^2$  or Fisher exact test for categorical variables and by Student t  
249 or Mann-Whitney U test for continuous variables among patients with LVO in efficacy  
250 items and among all patients in safety end-points. A descriptive analysis of adverse  
251 events will be presented in aggregate and by event.

252 Multivariable logistic or ordinal regression analyses will be used to determine factors  
253 that could be considered as independent predictors of good functional outcomes. The  
254 analyses will be adjusted using the variables that present a trend ( $p \leq 0.1$ ) or a statistical  
255 relationship with the explored outcome. The odds ratio (OR), along with its 95% CI  
256 based on logistic or ordinal regression, will be reported.

257 We will test heterogeneity of treatment effect by prespecified clinically relevant  
258 variables on the primary outcome using a multiplicative interaction term  
259 (treatment $\times$ prespecified variable) and mixed methods modeling.

### 260 **Ethics and dissemination**

261 ANGIOCAT study protocol was approved by the local ethics committee.

262 Any modifications of the protocol which may impact on the conduct of the study will  
263 require a formal amendment to the protocol approved by the ethics committee.

264

265 **Conclusion**

266 The ANGIOCAT study aims to provide evidence that for acute stroke patients with  
267 suspected LVO, a DTAS protocol (ultra-fast triage based on cone-beam CT in the  
268 angio-suite) can reduce workflow times and safely improve long term outcome as  
269 compared to a traditional neuroimaging selection protocol.

270

271

| <b>Clinical data</b>                                                                                                                    | <b>Radiological variables</b>                          |
|-----------------------------------------------------------------------------------------------------------------------------------------|--------------------------------------------------------|
| Demography data                                                                                                                         | Presence of intracranial hemorrhage                    |
| Medical story                                                                                                                           | Final infarct volume                                   |
| RACE score determinate by EMS                                                                                                           | ASPECTS score on baseline CT                           |
| NIHSS score at admission, after treatment, at 24 hours and at discharge                                                                 | Presence of large vessel occlusion by CTA or angiogram |
| Etiology TOAST scale                                                                                                                    | LVO location                                           |
| Workflow times:<br>- Symptoms onset<br>- Hospital arrival<br>- Imaging<br>- iv-tPA treatment<br>- Groin puncture<br>- Revascularization | <b>Endovascular treatment variables</b>                |
|                                                                                                                                         | Procedure duration                                     |
|                                                                                                                                         | mTICI score at the end of procedure                    |
|                                                                                                                                         | First pass reperfusion                                 |
|                                                                                                                                         | Periprocedural complications                           |
|                                                                                                                                         |                                                        |
| Length of admission                                                                                                                     |                                                        |
| Discharge destination                                                                                                                   |                                                        |
| Functional status measured by mRS at discharge and at 90 days (independent blind assessment).                                           |                                                        |

272

273 Table 1. Collected data. RACE: Rapid Arterial occlusion Evaluation. EMS: Emergency  
 274 Medical Service. NIHSS: National Institutes of Health Stroke Scale. TOAST: Trial  
 275 Organization in Acute Stroke Treatment. ASPECTS: Alberta Stroke Program Early CT  
 276 Score. LVO: Large Vessel Occlusion. mTICI: modified Treatment In Cerebral Ischemia.

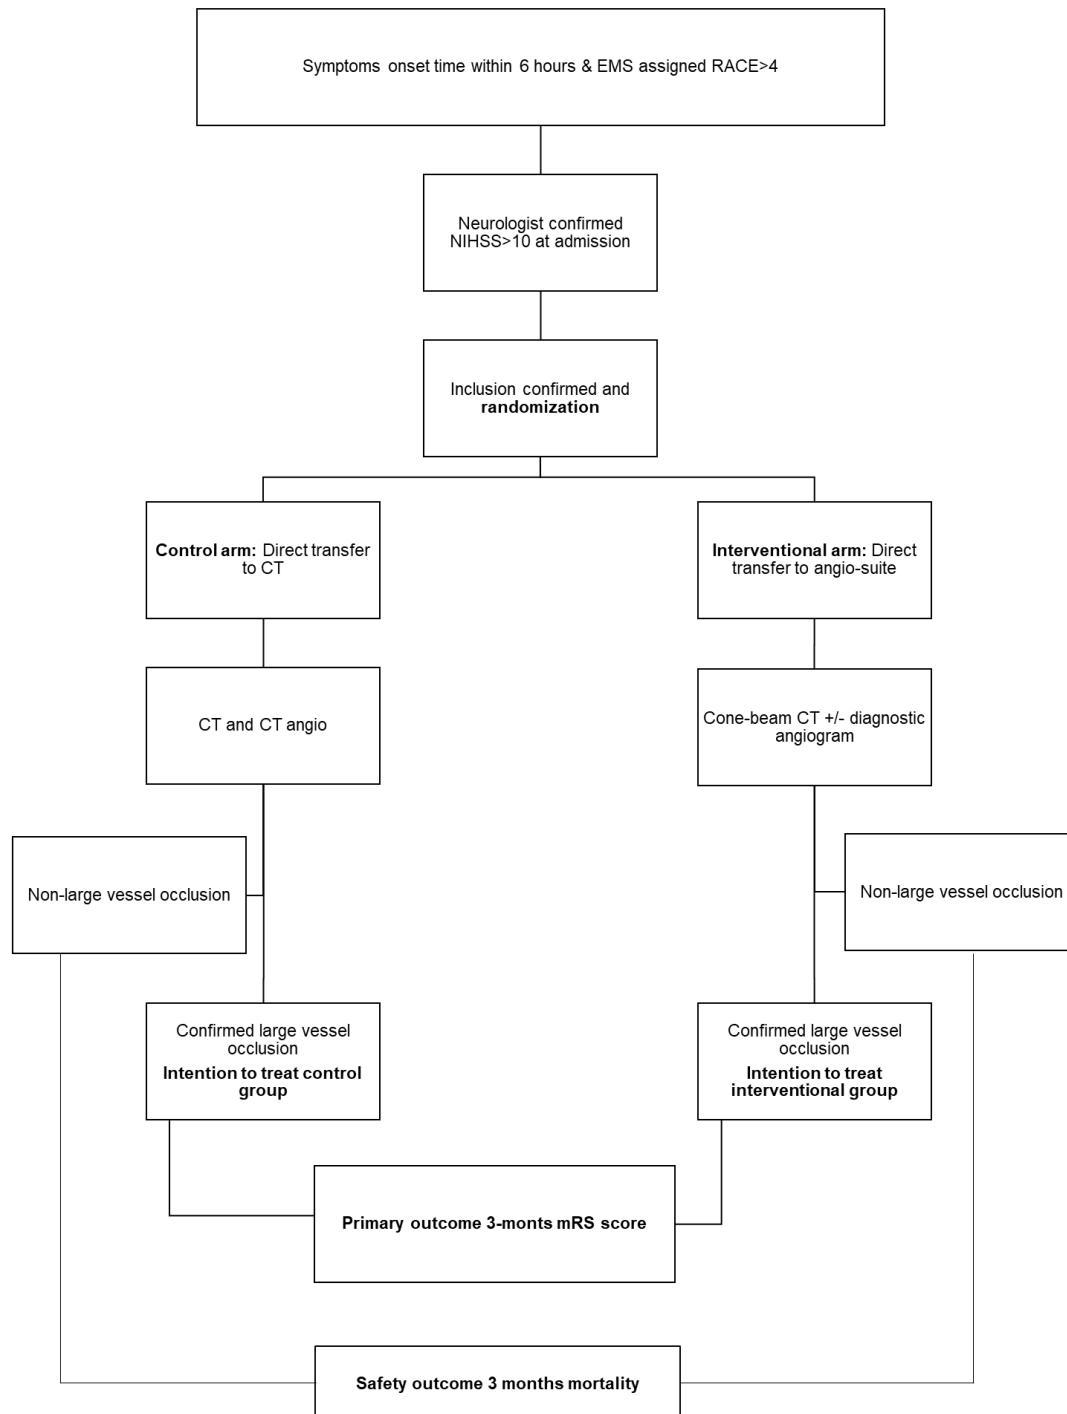

277

278 Figure 1. ANGIOCAT study flow chart.

**References**

- 280 1. Goyal M, Menon BK, van Zwam WH, Dippel DW, Mitchell PJ, Demchuk AM, et al.  
281 al. Endovascular thrombectomy after large-vessel ischaemic stroke: a meta-analysis of  
282 individual patient data from five randomised trials. *Lancet*. 2016 Apr  
283 23;387(10029):1723-31. PubMed PMID: 26898852.
- 284 2. Saver JL, Goyal M, van der Lugt A, Menon BK, Majoie CB, Dippel DW, et al.  
285 Time to Treatment With Endovascular Thrombectomy and Outcomes From Ischemic  
286 Stroke: A Meta-analysis. *Jama*. 2016 Sep 27;316(12):1279-88. PubMed PMID:  
287 27673305.
- 288 3. Mazighi M, Chaudhry SA, Ribo M, Khatrri P, Skoloudik D, Mokin M, et al. Impact  
289 of onset-to-reperfusion time on stroke mortality: a collaborative pooled analysis.  
290 *Circulation*. 2013 May 14;127(19):1980-5. PubMed PMID: 23671178.
- 291 4. Madhok DY, Keenan KJ, Cole SB, Martin C, Hemphill JC, 3rd. Prehospital and  
292 Emergency Department-Focused Mission Protocol Improves Thrombolysis Metrics for  
293 Suspected Acute Stroke Patients. *Journal of stroke and cerebrovascular diseases : the*  
294 *official journal of National Stroke Association*. 2019 Oct 9:104423. PubMed PMID:  
295 31606319.
- 296 5. Perez de la Ossa N, Carrera D, Gorchs M, Querol M, Millan M, Gomis M, et al.  
297 Design and validation of a prehospital stroke scale to predict large arterial occlusion:  
298 the rapid arterial occlusion evaluation scale. *Stroke*. 2014 Jan;45(1):87-91. PubMed  
299 PMID: 24281224.
- 300 6. Powers WJ, Rabinstein AA, Ackerson T, Adeoye OM, Bambakidis NC, Becker  
301 K, et al. 2018 Guidelines for the Early Management of Patients With Acute Ischemic  
302 Stroke: A Guideline for Healthcare Professionals From the American Heart  
303 Association/American Stroke Association. *Stroke*. 2018 Mar;49(3):e46-e110. PubMed  
304 PMID: 29367334.
- 305 7. Requena M, Perez de la Ossa N, Abilleira S, Cardona P, Urra X, Marti-  
306 Fabregas J, et al. Predictors of Endovascular Treatment Among Stroke Codes  
307 Activated Within 6 Hours From Symptom Onset. *Stroke*. 2018 Sep;49(9):2116-21.  
308 PubMed PMID: 30354973.
- 309 8. Jadhav AP, Kenmuir CL, Aghaebrahim A, Limaye K, Wechsler LR, Hammer  
310 MD, et al. Interfacility Transfer Directly to the Neuroangiography Suite in Acute  
311 Ischemic Stroke Patients Undergoing Thrombectomy. *Stroke*. 2017 Jul;48(7):1884-9.  
312 PubMed PMID: 28536177.
- 313 9. Psychogios MN, Behme D, Schregel K, Tsogkas I, Maier IL, Leyhe JR, et al.  
314 One-Stop Management of Acute Stroke Patients: Minimizing Door-to-Reperfusion  
315 Times. *Stroke*. 2017 Nov;48(11):3152-5. PubMed PMID: 29018132.
- 316 10. Ribo M, Boned S, Rubiera M, Tomasello A, Coscojuela P, Hernandez D, et al.  
317 Direct transfer to angiosuite to reduce door-to-puncture time in thrombectomy for acute  
318 stroke. *Journal of neurointerventional surgery*. 2018 Mar;10(3):221-4. PubMed PMID:  
319 28446535.
- 320 11. Barber PA, Demchuk AM, Zhang J, Buchan AM. Validity and reliability of a  
321 quantitative computed tomography score in predicting outcome of hyperacute stroke  
322 before thrombolytic therapy. ASPECTS Study Group. *Alberta Stroke Programme Early*  
323 *CT Score*. *Lancet*. 2000 May 13;355(9216):1670-4. PubMed PMID: 10905241.
- 324 12. Goyal N, Tsivgoulis G, Frei D, Turk A, Baxter B, Froehler MT, et al.  
325 Comparative Safety and Efficacy of Modified TIC1 2b and TIC1 3 Reperfusion in Acute  
326 Ischemic Strokes Treated With Mechanical Thrombectomy. *Neurosurgery*. 2019 Mar  
327 1;84(3):680-6. PubMed PMID: 29618102.
- 328 13. Monleon-Getino T, Barnadas-Molins A, Roset-Gamisans M. [Sequential designs  
329 and intermediate analysis in clinical research: size vs difficulty]. *Medicina clinica*. 2009  
330 Mar 28;132(11):437-42. PubMed PMID: 19268995. *Disenos secuenciales y analisis*  
331 *intermedio en la investigacion clinica: tamano frente a dificultad*.

ANGIOCAT protocol

332

333
