# Supplementary material
Source: PubMed Central journal article supplement (PMC8329790)
Supplement: jamaneurol-e212385-s003.pdf [file jamaneurol-e212385-s003.pdf]

## Data Sharing Statement

Requena. Direct to Angiography Suite Without Stopping for Computed Tomography Imaging for Patients With Acute Stroke. *JAMA Neurol.* Published August 02, 2021. doi:10.1001/jamaneurol.2021.2385

### Data

**Data available:** Yes

**Data types:** Deidentified participant data, Data dictionary

**How to access data:** [m.requenaruiz@gmail.com](mailto:m.requenaruiz@gmail.com)

**When available:** With publication

### Supporting Documents

**Document types:** Informed consent form

**How to access documents:** [m.requenaruiz@gmail.com](mailto:m.requenaruiz@gmail.com)

**When available:** With publication

### Additional Information

**Who can access the data:** [m.requenaruiz@gmail.com](mailto:m.requenaruiz@gmail.com)

**Types of analyses:** For collaborate studies or metaanalysis

**Mechanisms of data availability:** After approval of a proposal
